# Supplementary material
Source: PubMed Central journal article supplement (PMC6108848)
Supplement: EHP2535.s001.acco.pdf [file EHP2535.s001.acco.pdf]

**Note to readers with disabilities:** *EHP* strives to ensure that all journal content is accessible to all readers. However, some figures and Supplemental Material published in *EHP* articles may not conform to [508 standards](#) due to the complexity of the information being presented. If you need assistance accessing journal content, please contact [ehp508@niehs.nih.gov](mailto:ehp508@niehs.nih.gov). Our staff will work with you to assess and meet your accessibility needs within 3 working days.

### **Supplemental Material**

#### **Fine Particulate Air Pollution and Adverse Birth Outcomes: Effect Modification by Regional Nonvolatile Oxidative Potential**

Éric Lavigne, Richard T. Burnett, David M. Stieb, Greg J. Evans, Krystal J. Godri Pollitt, Hong Chen, David van Rijswijk, and Scott Weichenthal

#### **Table of Contents**

**Table S1.** Pearson correlation coefficients across time periods for air pollution measures.

**Table S2.** Associations between exposure to PM<sub>2.5</sub> and PM<sub>2.5</sub> oxidative burden with additional adjustment for NO<sub>2</sub>, O<sub>3</sub> and their combined oxidant capacity over the first trimester of exposure during pregnancy and birth outcomes in Ontario, Canada (2006 – 2012).

**Table S3.** Associations between exposure to PM<sub>2.5</sub> and PM<sub>2.5</sub> oxidative burden with additional adjustment for NO<sub>2</sub>, O<sub>3</sub> and their combined oxidant capacity over the second trimester of exposure during pregnancy and birth outcomes in Ontario, Canada (2006 – 2012).

**Table S4.** Associations between exposure to PM<sub>2.5</sub> and PM<sub>2.5</sub> oxidative burden with additional adjustment for NO<sub>2</sub>, O<sub>3</sub> and their combined oxidant capacity over the third trimester of exposure during pregnancy and birth outcomes in Ontario, Canada (2006 – 2012).

**Table S5.** Associations between exposure to PM<sub>2.5</sub> and PM<sub>2.5</sub> oxidative burden with additional adjustment for NO<sub>2</sub>, O<sub>3</sub> and their combined oxidant capacity over the whole pregnancy and birth outcomes in Ontario, Canada (2006 – 2012).

**Table S6.** Associations between exposure to PM<sub>2.5</sub> and PM<sub>2.5</sub> oxidative burden with additional adjustment for NO<sub>2</sub>, O<sub>3</sub> and their combined oxidant capacity over acute exposure periods and preterm birth in Ontario, Canada (2006 – 2012).

**Table S7.** Associations (95% CIs) between exposure to PM<sub>2.5</sub> across quartiles of ascorbic acid-related oxidative potential (OP<sup>AA</sup>) over different periods of exposure during pregnancy and birth outcomes in Ontario, Canada (2006 – 2012).

**Table S8.** Second-stage random-effects meta-analysis and meta-regression models: multivariate Wald test on significance of each oxidative potential meta-predictor in explaining variation in overall associations, Cochran Q test for heterogeneity,  $I^2$  statistics for residual heterogeneity.

**Table S9.** Associations between exposure to  $PM_{2.5}$  and  $PM_{2.5}$  oxidative burden over different periods of exposure during pregnancy and birth outcomes in Ontario, Canada (2006 – 2012).

**Figure S1.** Associations between weekly  $PM_{2.5}$  levels over gestation and term low birth weight, stratified according to below 25th percentile of  $OP^{GSH}$  (left) and above the 75th percentile of  $OP^{GSH}$  (right) in Ontario, Canada (2006 – 2012). Solid lines reflect point estimates and gray areas reflect 95% confidence intervals.

**Figure S2.** Associations between weekly  $PM_{2.5}$  levels over gestation and term low birth weight, stratified according to below 25th percentile of  $OP^{AA}$  (left) and above the 75th percentile of  $OP^{AA}$  (right) in Ontario, Canada (2006 – 2012). Solid lines reflect point estimates and gray areas reflect 95% confidence intervals.

**Figure S3.** Associations between weekly  $PM_{2.5}$  levels over gestation and term birth weight, stratified according to below 25th percentile of  $OP^{GSH}$  (left) and above the 75th percentile of  $OP^{GSH}$  (right) in Ontario, Canada (2006 – 2012). Solid lines reflect point estimates and gray areas reflect 95% confidence intervals.

**Figure S4.** Associations between weekly  $PM_{2.5}$  levels over gestation and term birth weight, stratified according to below 25th percentile of  $OP^{AA}$  (left) and above the 75th percentile of  $OP^{AA}$  (right) in Ontario, Canada (2006 – 2012). Solid lines reflect point estimates and gray areas reflect 95% confidence intervals.

**Figure S5.** Associations between weekly  $PM_{2.5}$  levels over the last 4 weeks of pregnancy and preterm birth, stratified according to below 25th percentile of  $OP^{GSH}$  (left) and above the 75th percentile of  $OP^{GSH}$  (right) in Ontario, Canada (2006 – 2012). Solid lines reflect point estimates and gray areas reflect 95% confidence intervals.

**Figure S6.** Associations between weekly  $PM_{2.5}$  levels over the last 4 weeks of pregnancy and preterm birth, stratified according to below 25th percentile of  $OP^{AA}$  (left) and above the 75th percentile of  $OP^{AA}$  (right) in Ontario, Canada (2006 – 2012). Solid lines reflect point estimates and gray areas reflect 95% confidence intervals.

**Figure S7.** Associations between daily  $PM_{2.5}$  levels over the last week of pregnancy and preterm birth, stratified according to below 25th percentile of  $OP^{AA}$  (left) and above the 75th percentile of  $OP^{AA}$  (right) in Ontario, Canada (2006 – 2012). Solid lines reflect point estimates and gray areas reflect 95% confidence intervals.

**Table S1.** Pearson correlation coefficients across time periods for air pollution measures.

| Air pollutant                          | PM <sub>2.5</sub> (µg/m <sup>3</sup> ) |               |               |                   | Oxidative potential |                  |
|----------------------------------------|----------------------------------------|---------------|---------------|-------------------|---------------------|------------------|
|                                        | 1st trimester                          | 2nd trimester | 3rd trimester | Pregnancy average | OP <sup>GSH</sup>   | OP <sup>AA</sup> |
| PM <sub>2.5</sub> (µg/m <sup>3</sup> ) |                                        |               |               |                   |                     |                  |
| 1 <sup>st</sup> trimester              | 1.00                                   |               |               |                   |                     |                  |
| 2 <sup>nd</sup> trimester              | 0.60                                   | 1.00          |               |                   |                     |                  |
| 3 <sup>rd</sup> trimester              | 0.57                                   | 0.57          | 1.00          |                   |                     |                  |
| Pregnancy average                      | 0.85                                   | 0.85          | 0.83          | 1.00              |                     |                  |
| Oxidative potential                    |                                        |               |               |                   |                     |                  |
| OP <sup>GSH</sup>                      | -0.04                                  | -0.04         | -0.04         | -0.05             | 1.00                |                  |
| OP <sup>AA</sup>                       | 0.15                                   | 0.15          | 0.15          | 0.17              | 0.03                | 1.00             |

**Table S2.** Associations between exposure to PM<sub>2.5</sub> and PM<sub>2.5</sub> oxidative burden with additional adjustment for NO<sub>2</sub>, O<sub>3</sub> and their combined oxidant capacity over the first trimester of exposure during pregnancy and birth outcomes in Ontario, Canada (2006 – 2012).

| Model                                    | PM <sub>2.5</sub>   | PM <sub>2.5</sub> *OP <sup>GSH</sup> | PM <sub>2.5</sub> *OP <sup>AA</sup> |
|------------------------------------------|---------------------|--------------------------------------|-------------------------------------|
| <b>Term low birth weight OR (95% CI)</b> |                     |                                      |                                     |
| Base model                               | 1.08 (1.01, 1.15)   | 1.31 (1.07, 1.61)                    | 1.12 (0.95, 1.32)                   |
| NO <sub>2</sub>                          | 1.06 (0.98, 1.15)   | 1.27 (1.01, 1.61)                    | 1.09 (0.93, 1.28)                   |
| O <sub>3</sub>                           | 1.05 (0.98, 1.14)   | 1.28 (1.03, 1.59)                    | 1.09 (0.92, 1.28)                   |
| NO <sub>2</sub> and O <sub>3</sub>       | 1.06 (0.97, 1.15)   | 1.25 (0.96, 1.62)                    | 1.09 (0.91, 1.30)                   |
| O <sub>x</sub>                           | 1.05 (0.97, 1.15)   | 1.27 (0.99, 1.63)                    | 1.07 (0.91, 1.27)                   |
| O <sub>x</sub> <sup>wt</sup>             | 1.05 (0.97, 1.14)   | 1.26 (0.99, 1.61)                    | 1.07 (0.90, 1.26)                   |
| <b>Preterm birth OR (95% CI)</b>         |                     |                                      |                                     |
| Base model                               | 0.95 (0.77, 1.18)   | 0.70 (0.36, 1.36)                    | 0.90 (0.53, 1.54)                   |
| NO <sub>2</sub>                          | 0.97 (0.91, 1.04)   | 0.98 (0.87, 1.10)                    | 0.88 (0.69, 1.12)                   |
| O <sub>3</sub>                           | 0.92 (0.74, 1.15)   | 0.61 (0.30, 1.24)                    | 0.80 (0.45, 1.42)                   |
| NO <sub>2</sub> and O <sub>3</sub>       | 0.92 (0.81, 1.05)   | 0.66 (0.42, 1.05)                    | 0.77 (0.53, 1.11)                   |
| O <sub>x</sub>                           | 0.86 (0.69, 1.07)   | 0.47 (0.23, 0.99)                    | 0.67 (0.37, 1.21)                   |
| O <sub>x</sub> <sup>wt</sup>             | 0.85 (0.68, 1.05)   | 0.45 (0.22, 0.93)                    | 0.64 (0.36, 1.14)                   |
| <b>Term birth weight β (95% CI)</b>      |                     |                                      |                                     |
| Base model                               | -0.91 (-5.64, 3.83) | -3.74 (-15.24, 7.76)                 | -0.74 (-9.11, 7.63)                 |
| NO <sub>2</sub>                          | -0.88 (-5.60, 3.90) | -3.69 (-15.20, 7.80)                 | -0.73 (-9.10, 7.65)                 |
| O <sub>3</sub>                           | -0.87 (-5.61, 3.90) | -3.69 (-15.20, 7.79)                 | -0.72 (-9.10, 7.65)                 |
| NO <sub>2</sub> and O <sub>3</sub>       | -0.90 (-5.62, 3.90) | -3.70 (-15.21, 7.78)                 | -0.71 (-9.08, 7.70)                 |
| O <sub>x</sub>                           | -0.91 (-5.66, 3.89) | -3.71 (-15.24, 7.80)                 | -0.74 (-9.10, 7.63)                 |
| O <sub>x</sub> <sup>wt</sup>             | -0.90 (-5.63, 3.84) | -3.72 (-15.22, 7.79)                 | -0.73 (-9.10, 7.64)                 |

Estimates of association are for IQR increases in exposure to PM<sub>2.5</sub> (2.6 µg/m<sup>3</sup>), PM<sub>2.5</sub>\*OP<sup>GSH</sup> (1.16% depletion/m<sup>3</sup>), or PM<sub>2.5</sub>\*OP<sup>AA</sup> (1.42% depletion/m<sup>3</sup>). Models represent pooled city-specific estimates derived using two-stage random effects meta-analysis and logistic regression (term low birth weight and ORs for preterm birth in association with chronic exposures) or linear regression (term birth weight). Models were adjusted for maternal age at delivery, marital status, maternal cigarette smoking during pregnancy, infant sex, parity, previous caesarean section delivery, maternal comorbidities (i.e. asthma, hypertension, type I and II diabetes mellitus, preeclampsia and gestational diabetes), year of birth, month of birth, census dissemination area median family income, census dissemination area proportion of population who are visible minority and census dissemination area proportion of the adult female population aged 25-64 years old who completed postsecondary education; gestational age was also included in term low birth weight and term birth weight models.

Abbreviations: OR: Odds ratio; β: beta coefficient; PM<sub>2.5</sub>\*OP<sup>GSH</sup>: glutathione-related oxidative burden; PM<sub>2.5</sub>\*OP<sup>AA</sup>: ascorbate-related oxidative burden; O<sub>x</sub>: combined oxidant capacity of NO<sub>2</sub> and O<sub>3</sub>; O<sub>x</sub><sup>wt</sup>: redox-weighted oxidant capacity of NO<sub>2</sub> and O<sub>3</sub>.

**Table S3.** Associations between exposure to PM<sub>2.5</sub> and PM<sub>2.5</sub> oxidative burden with additional adjustment for NO<sub>2</sub>, O<sub>3</sub> and their combined oxidant capacity over the second trimester of exposure during pregnancy and birth outcomes in Ontario, Canada (2006 – 2012).

| Model                                    | PM <sub>2.5</sub>  | PM <sub>2.5</sub> *OP <sup>GSH</sup> | PM <sub>2.5</sub> *OP <sup>AA</sup> |
|------------------------------------------|--------------------|--------------------------------------|-------------------------------------|
| <b>Term low birth weight OR (95% CI)</b> |                    |                                      |                                     |
| Base model                               | 0.96 (0.91, 1.02)  | 0.94 (0.80, 1.10)                    | 0.92 (0.82, 1.04)                   |
| NO <sub>2</sub>                          | 0.95 (0.89, 1.01)  | 0.91 (0.77, 1.08)                    | 0.89 (0.78, 1.01)                   |
| O <sub>3</sub>                           | 0.96 (0.91, 1.03)  | 0.94 (0.80, 1.10)                    | 0.93 (0.81, 1.05)                   |
| NO <sub>2</sub> and O <sub>3</sub>       | 0.95 (0.89, 1.01)  | 0.89 (0.74, 1.07)                    | 0.88 (0.76, 1.01)                   |
| O <sub>x</sub>                           | 0.95 (0.89, 1.02)  | 0.91 (0.77, 1.08)                    | 0.89 (0.78, 1.02)                   |
| O <sub>x</sub> <sup>wt</sup>             | 0.96 (0.90, 1.02)  | 0.92 (0.78, 1.09)                    | 0.91 (0.79, 1.04)                   |
| <b>Preterm birth OR (95% CI)</b>         |                    |                                      |                                     |
| Base model                               | 1.00 (0.91, 1.10)  | 0.99 (0.74, 1.33)                    | 1.03 (0.82, 1.30)                   |
| NO <sub>2</sub>                          | 1.01 (0.94, 1.08)  | 1.05 (0.83, 1.33)                    | 1.04 (0.89, 1.23)                   |
| O <sub>3</sub>                           | 1.01 (0.93, 1.10)  | 1.04 (0.79, 1.36)                    | 1.06 (0.85, 1.31)                   |
| NO <sub>2</sub> and O <sub>3</sub>       | 1.05 (0.95, 1.17)  | 1.20 (0.83, 1.74)                    | 1.15 (0.85, 1.57)                   |
| O <sub>x</sub>                           | 1.06 (0.94, 1.19)  | 1.20 (0.79, 1.83)                    | 1.15 (0.85, 1.57)                   |
| O <sub>x</sub> <sup>wt</sup>             | 1.04 (0.93, 1.15)  | 1.12 (0.79, 1.83)                    | 1.11 (0.85, 1.45)                   |
| <b>Term birth weight β (95% CI)</b>      |                    |                                      |                                     |
| Base model                               | 0.88 (-3.68, 5.45) | -2.41 (-13.77, 8.96)                 | 3.26 (-4.71, 11.23)                 |
| NO <sub>2</sub>                          | 0.84 (-3.72, 5.41) | -2.38 (-13.75, 8.98)                 | 3.24 (-4.69, 11.25)                 |
| O <sub>3</sub>                           | 0.84 (-3.71, 5.40) | -2.37 (-13.75, 8.97)                 | 3.24 (-4.69, 11.25)                 |
| NO <sub>2</sub> and O <sub>3</sub>       | 0.83(-3.69, 5.40)  | -2.37 (-13.75, 8.98)                 | 3.24 (-4.69, 11.25)                 |
| O <sub>x</sub>                           | 0.88 (-3.67, 5.44) | -2.40 (-13.78, 8.97)                 | 3.26 (-4.71, 11.23)                 |
| O <sub>x</sub> <sup>wt</sup>             | 0.87 (-3.67, 5.46) | -2.40 (-13.78, 8.97)                 | 3.25 (-4.70, 11.24)                 |

Estimates of association are for IQR increases in exposure to PM<sub>2.5</sub> (2.6 µg/m<sup>3</sup>), PM<sub>2.5</sub>\*OP<sup>GSH</sup> (1.16% depletion/m<sup>3</sup>), or PM<sub>2.5</sub>\*OP<sup>AA</sup> (1.42% depletion/m<sup>3</sup>). Models represent pooled city-specific estimates derived using two-stage random effects meta-analysis and logistic regression (term low birth weight and ORs for preterm birth in association with chronic exposures) or linear regression (term birth weight). Models were adjusted for maternal age at delivery, marital status, maternal cigarette smoking during pregnancy, infant sex, parity, previous caesarean section delivery, maternal comorbidities (i.e. asthma, hypertension, type I and II diabetes mellitus, preeclampsia and gestational diabetes), year of birth, month of birth, census dissemination area median family income, census dissemination area proportion of population who are visible minority and census dissemination area proportion of the adult female population aged 25-64 years old who completed postsecondary education; gestational age was also included in term low birth weight and term birth weight models.

Abbreviations: OR: Odds ratio; β: beta coefficient; PM<sub>2.5</sub>\*OP<sup>GSH</sup>: glutathione-related oxidative burden; PM<sub>2.5</sub>\*OP<sup>AA</sup>: ascorbate-related oxidative burden; O<sub>x</sub>: combined oxidant capacity of NO<sub>2</sub> and O<sub>3</sub>; O<sub>x</sub><sup>wt</sup>: redox-weighted oxidant capacity of NO<sub>2</sub> and O<sub>3</sub>.

**Table S4.** Associations between exposure to PM<sub>2.5</sub> and PM<sub>2.5</sub> oxidative burden with additional adjustment for NO<sub>2</sub>, O<sub>3</sub> and their combined oxidant capacity over the third trimester of exposure during pregnancy and birth outcomes in Ontario, Canada (2006 – 2012).

| Model                                    | PM <sub>2.5</sub>   | PM <sub>2.5</sub> *OP <sup>GSH</sup> | PM <sub>2.5</sub> *OP <sup>AA</sup> |
|------------------------------------------|---------------------|--------------------------------------|-------------------------------------|
| <b>Term low birth weight OR (95% CI)</b> |                     |                                      |                                     |
| Base model                               | 0.95 (0.90, 1.00)   | 0.92 (0.79, 1.07)                    | 0.89 (0.79, 1.00)                   |
| NO <sub>2</sub>                          | 0.96 (0.90, 1.02)   | 0.94 (0.80, 1.10)                    | 0.91 (0.80, 1.04)                   |
| O <sub>3</sub>                           | 0.96 (0.90, 1.01)   | 0.93 (0.80, 1.09)                    | 0.90 (0.80, 1.01)                   |
| NO <sub>2</sub> and O <sub>3</sub>       | 0.97 (0.91, 1.03)   | 0.95 (0.81, 1.12)                    | 0.92 (0.81, 1.05)                   |
| O <sub>x</sub>                           | 0.97 (0.91, 1.03)   | 0.95 (0.81, 1.12)                    | 0.92 (0.81, 1.04)                   |
| O <sub>x</sub> <sup>wt</sup>             | 0.96 (0.90, 1.02)   | 0.94 (0.80, 1.11)                    | 0.91 (0.80, 1.03)                   |
| <b>Preterm birth OR (95% CI)</b>         |                     |                                      |                                     |
| Base model                               | 0.98 (0.94, 1.03)   | 0.96 (0.85, 1.09)                    | 0.97 (0.87, 1.07)                   |
| NO <sub>2</sub>                          | 0.98 (0.93, 1.03)   | 0.95 (0.82, 1.09)                    | 0.95 (0.85, 1.07)                   |
| O <sub>3</sub>                           | 1.00 (0.95, 1.06)   | 1.02 (0.89, 1.18)                    | 1.02 (0.90, 1.15)                   |
| NO <sub>2</sub> and O <sub>3</sub>       | 1.00 (0.95, 1.06)   | 1.02 (0.88, 1.18)                    | 1.02 (0.90, 1.16)                   |
| O <sub>x</sub>                           | 1.02 (0.96, 1.09)   | 1.08 (0.91, 1.30)                    | 1.06 (0.91, 1.22)                   |
| O <sub>x</sub> <sup>wt</sup>             | 1.02 (0.96, 1.08)   | 1.07 (0.91, 1.26)                    | 1.05 (0.91, 1.20)                   |
| <b>Term birth weight β (95% CI)</b>      |                     |                                      |                                     |
| Base model                               | 6.60 (-2.22, 12.98) | 6.69 (-4.26, 17.63)                  | 10.62 (2.89, 18.35)                 |
| NO <sub>2</sub>                          | 6.57 (-2.19, 13.01) | 6.67 (-4.24, 17.65)                  | 10.59 (2.92, 18.38)                 |
| O <sub>3</sub>                           | 6.57 (-2.19, 13.01) | 6.68 (-4.25, 17.64)                  | 10.62 (2.89, 18.35)                 |
| NO <sub>2</sub> and O <sub>3</sub>       | 6.57 (-2.19, 13.01) | 6.67 (-4.24, 17.65)                  | 10.59 (2.86, 18.32)                 |
| O <sub>x</sub>                           | 6.59 (-2.21, 12.99) | 6.69 (-4.26, 17.63)                  | 10.61 (2.88, 18.34)                 |
| O <sub>x</sub> <sup>wt</sup>             | 6.59 (-2.21, 12.99) | 6.69 (-4.26, 17.63)                  | 10.62 (2.89, 18.35)                 |

Estimates of association are for IQR increases in exposure to PM<sub>2.5</sub> (2.6 µg/m<sup>3</sup>), PM<sub>2.5</sub>\*OP<sup>GSH</sup> (1.16% depletion/m<sup>3</sup>), or PM<sub>2.5</sub>\*OP<sup>AA</sup> (1.42% depletion/m<sup>3</sup>). Models represent pooled city-specific estimates derived using two-stage random effects meta-analysis and logistic regression (term low birth weight and ORs for preterm birth in association with chronic exposures) or linear regression (term birth weight). Models were adjusted for maternal age at delivery, marital status, maternal cigarette smoking during pregnancy, infant sex, parity, previous caesarean section delivery, maternal comorbidities (i.e. asthma, hypertension, type I and II diabetes mellitus, preeclampsia and gestational diabetes), year of birth, month of birth, census dissemination area median family income, census dissemination area proportion of population who are visible minority and census dissemination area proportion of the adult female population aged 25-64 years old who completed postsecondary education; gestational age was also included in term low birth weight and term birth weight models.

Abbreviations: OR: Odds ratio; β: beta coefficient; PM<sub>2.5</sub>\*OP<sup>GSH</sup>: glutathione-related oxidative burden; PM<sub>2.5</sub>\*OP<sup>AA</sup>: ascorbate-related oxidative burden; O<sub>x</sub>: combined oxidant capacity of NO<sub>2</sub> and O<sub>3</sub>; O<sub>x</sub><sup>wt</sup>: redox-weighted oxidant capacity of NO<sub>2</sub> and O<sub>3</sub>.

**Table S5.** Associations between exposure to PM<sub>2.5</sub> and PM<sub>2.5</sub> oxidative burden with additional adjustment for NO<sub>2</sub>, O<sub>3</sub> and their combined oxidant capacity over the whole pregnancy and birth outcomes in Ontario, Canada (2006 – 2012).

| Model                                    | PM <sub>2.5</sub>   | PM <sub>2.5</sub> *OP <sup>GSH</sup> | PM <sub>2.5</sub> *OP <sup>AA</sup> |
|------------------------------------------|---------------------|--------------------------------------|-------------------------------------|
| <b>Term low birth weight OR (95% CI)</b> |                     |                                      |                                     |
| Base model                               | 0.96 (0.86, 1.07)   | 1.15 (0.84, 1.56)                    | 0.90 (0.73, 1.11)                   |
| NO <sub>2</sub>                          | 0.94 (0.83, 1.17)   | 1.02 (0.68, 1.54)                    | 0.87 (0.68, 1.13)                   |
| O <sub>3</sub>                           | 0.98 (0.87, 1.11)   | 1.18 (0.84, 1.66)                    | 0.92 (0.73, 1.15)                   |
| NO <sub>2</sub> and O <sub>3</sub>       | 0.95 (0.83, 1.09)   | 1.01 (0.65, 1.56)                    | 0.89 (0.67, 1.18)                   |
| O <sub>x</sub>                           | 0.96 (0.84, 1.10)   | 1.10 (0.73, 1.66)                    | 0.91 (0.70, 1.18)                   |
| O <sub>x</sub> <sup>wt</sup>             | 0.97 (0.85, 1.10)   | 1.14 (0.79, 1.65)                    | 0.91 (0.71, 1.17)                   |
| <b>Preterm birth OR (95% CI)</b>         |                     |                                      |                                     |
| Base model                               | 0.94 (0.84, 1.04)   | 0.79 (0.55, 1.12)                    | 0.90 (0.67, 1.20)                   |
| NO <sub>2</sub>                          | 0.96 (0.85, 1.08)   | 0.87 (0.58, 1.29)                    | 0.92 (0.70, 1.21)                   |
| O <sub>3</sub>                           | 0.86 (0.78, 0.95)   | 0.65 (0.43, 0.94)                    | 0.72 (0.57, 0.91)                   |
| NO <sub>2</sub> and O <sub>3</sub>       | 0.96 (0.82, 1.12)   | 0.88 (0.55, 1.43)                    | 0.89 (0.62, 1.28)                   |
| O <sub>x</sub>                           | 0.95 (0.85, 1.07)   | 0.89 (0.65, 1.23)                    | 0.89 (0.70, 1.13)                   |
| O <sub>x</sub> <sup>wt</sup>             | 0.89 (0.80, 0.98)   | 0.73 (0.54, 0.99)                    | 0.77 (0.62, 0.95)                   |
| <b>Term birth weight β (95% CI)</b>      |                     |                                      |                                     |
| Base model                               | 5.49 (-1.46, 12.33) | 1.50 (-12.98, 15.98)                 | 9.19 (-1.94, 20.32)                 |
| NO <sub>2</sub>                          | 5.47 (-1.48, 12.31) | 1.48 (-13.00, 15.96)                 | 9.17 (-1.96, 20.30)                 |
| O <sub>3</sub>                           | 5.49 (-1.46, 12.33) | 1.50 (-12.98, 15.98)                 | 9.18 (-1.95, 20.31)                 |
| NO <sub>2</sub> and O <sub>3</sub>       | 5.47 (-1.48, 12.31) | 1.48 (-13.00, 15.96)                 | 9.17 (-1.96, 20.30)                 |
| O <sub>x</sub>                           | 5.49 (-1.46, 12.33) | 1.50 (-12.98, 15.98)                 | 9.19 (-1.94, 20.32)                 |
| O <sub>x</sub> <sup>wt</sup>             | 5.49 (-1.46, 12.33) | 1.49 (-12.99, 15.97)                 | 9.19 (-1.94, 20.32)                 |

Estimates of association are for IQR increases in exposure to PM<sub>2.5</sub> (2.6 µg/m<sup>3</sup>), PM<sub>2.5</sub>\*OP<sup>GSH</sup> (1.16% depletion/m<sup>3</sup>), or PM<sub>2.5</sub>\*OP<sup>AA</sup> (1.42% depletion/m<sup>3</sup>). Models represent pooled city-specific estimates derived using two-stage random effects meta-analysis and logistic regression (term low birth weight and ORs for preterm birth in association with chronic exposures) or linear regression (term birth weight). Models were adjusted for maternal age at delivery, marital status, maternal cigarette smoking during pregnancy, infant sex, parity, previous caesarean section delivery, maternal comorbidities (i.e. asthma, hypertension, type I and II diabetes mellitus, preeclampsia and gestational diabetes), year of birth, month of birth, census dissemination area median family income, census dissemination area proportion of population who are visible minority and census dissemination area proportion of the adult female population aged 25-64 years old who completed postsecondary education; gestational age was also included in term low birth weight and term birth weight models.

Abbreviations: OR: Odds ratio; β: beta coefficient; PM<sub>2.5</sub>\*OP<sup>GSH</sup>: glutathione-related oxidative burden; PM<sub>2.5</sub>\*OP<sup>AA</sup>: ascorbate-related oxidative burden; O<sub>x</sub>: combined oxidant capacity of NO<sub>2</sub> and O<sub>3</sub>; O<sub>x</sub><sup>wt</sup>: redox-weighted oxidant capacity of NO<sub>2</sub> and O<sub>3</sub>.

**Table S6.** Associations between exposure to PM<sub>2.5</sub> and PM<sub>2.5</sub> oxidative burden with additional adjustment for NO<sub>2</sub>, O<sub>3</sub> and their combined oxidant capacity over acute exposure periods and preterm birth in Ontario, Canada (2006 – 2012).

| Model                              | PM <sub>2.5</sub> | PM <sub>2.5</sub> *OP <sup>GSH</sup> | PM <sub>2.5</sub> *OP <sup>AA</sup> |
|------------------------------------|-------------------|--------------------------------------|-------------------------------------|
|                                    | HR (95% CI)       | HR (95% CI)                          | HR (95% CI)                         |
| <b>Last 4 weeks of pregnancy</b>   |                   |                                      |                                     |
| Base model                         | 0.94 (0.89, 0.99) | 0.93 (0.86, 1.08)                    | 0.96 (0.88, 1.09)                   |
| NO <sub>2</sub>                    | 0.95 (0.89, 1.00) | 0.94 (0.87, 1.08)                    | 0.96 (0.88, 1.09)                   |
| O <sub>3</sub>                     | 0.94 (0.89, 0.99) | 0.93 (0.86, 1.08)                    | 0.96 (0.88, 1.09)                   |
| NO <sub>2</sub> and O <sub>3</sub> | 0.94 (0.89, 0.99) | 0.94 (0.87, 1.09)                    | 0.96 (0.88, 1.09)                   |
| O <sub>x</sub>                     | 0.94 (0.89, 0.99) | 0.93 (0.86, 1.08)                    | 0.96 (0.88, 1.09)                   |
| O <sub>x</sub> <sup>wt</sup>       | 0.94 (0.89, 0.99) | 0.93 (0.86, 1.08)                    | 0.96 (0.88, 1.09)                   |
| <b>Same day of delivery</b>        |                   |                                      |                                     |
| Base model                         | 0.99 (0.98, 1.00) | 1.01 (0.99, 1.02)                    | 0.99 (0.99, 1.00)                   |
| NO <sub>2</sub>                    | 0.99 (0.97, 1.01) | 1.01 (0.98, 1.02)                    | 0.99 (0.99, 1.00)                   |
| O <sub>3</sub>                     | 0.99 (0.98, 1.00) | 1.01 (0.99, 1.02)                    | 0.99 (0.99, 1.00)                   |
| NO <sub>2</sub> and O <sub>3</sub> | 0.99 (0.98, 1.00) | 1.01 (0.99, 1.02)                    | 0.99 (0.99, 1.00)                   |
| O <sub>x</sub>                     | 0.99 (0.98, 1.00) | 1.01 (0.99, 1.02)                    | 0.99 (0.99, 1.00)                   |
| O <sub>x</sub> <sup>wt</sup>       | 0.99 (0.98, 1.00) | 1.01 (0.99, 1.02)                    | 0.99 (0.99, 1.00)                   |

Estimates of association are for IQR increases in exposure to PM<sub>2.5</sub> (7.1 µg/m<sup>3</sup>), PM<sub>2.5</sub>\*OP<sup>GSH</sup> (1.16% depletion/m<sup>3</sup>), or PM<sub>2.5</sub>\*OP<sup>AA</sup> (1.42% depletion/m<sup>3</sup>). Models represent pooled city-specific estimates derived using two-stage random effects meta-analysis and Cox proportional hazard models (HRs for preterm birth in association with exposures during the last 4 weeks of pregnancy or on the day of delivery). Models were adjusted for maternal age at delivery, marital status, maternal cigarette smoking during pregnancy, infant sex, parity, previous caesarean section delivery, maternal comorbidities (i.e. asthma, hypertension, type I and II diabetes mellitus, preeclampsia and gestational diabetes), year of birth, month of birth, mean temperature and mean relative humidity, census dissemination area median family income, census dissemination area proportion of population who are visible minority and census dissemination area proportion of the adult female population aged 25-64 years old who completed postsecondary education

Abbreviations: HR: Hazard ratio; PM<sub>2.5</sub>\*OP<sup>GSH</sup>: glutathione-related oxidative burden; PM<sub>2.5</sub>\*OP<sup>AA</sup>: ascorbate-related oxidative burden; O<sub>x</sub>: combined oxidant capacity of NO<sub>2</sub> and O<sub>3</sub>; O<sub>x</sub><sup>wt</sup>: redox-weighted oxidant capacity of NO<sub>2</sub> and O<sub>3</sub>.



**Table S7.** Associations (95% CIs) between exposure to PM<sub>2.5</sub> across quartiles of ascorbic acid-related oxidative potential (OP<sup>AA</sup>) over different periods of exposure during pregnancy and birth outcomes in Ontario, Canada (2006 – 2012).

| Birth outcome and exposure time period       | Percentile of OP <sup>AA</sup> |                      |                      |                      | P value for effect modification |
|----------------------------------------------|--------------------------------|----------------------|----------------------|----------------------|---------------------------------|
|                                              | <25th                          | 25-50th              | 50-75th              | >75th                |                                 |
| <b>Term low birth weight</b><br>OR (95% CI)  |                                |                      |                      |                      |                                 |
| 1 <sup>st</sup> trimester                    | 1.23 (0.91, 1.65)              | 1.05 (0.89, 1.24)    | 1.10 (0.98, 1.25)    | 1.04 (0.90, 1.20)    | 0.46                            |
| 2 <sup>nd</sup> trimester                    | 0.96 (0.80, 1.17)              | 0.93 (0.80, 1.08)    | 1.01 (0.91, 1.11)    | 0.93 (0.84, 1.03)    | 0.82                            |
| 3 <sup>rd</sup> trimester                    | 1.06 (0.80, 1.40)              | 1.01 (0.86, 1.18)    | 0.88 (0.78, 0.98)    | 0.95 (0.86, 1.05)    | 0.18                            |
| Whole pregnancy                              | 1.24 (0.72, 2.11)              | 0.96 (0.72, 1.27)    | 0.99 (0.80, 1.21)    | 0.93 (0.79, 1.10)    | 0.50                            |
| <b>Preterm birth</b>                         |                                |                      |                      |                      |                                 |
| <i>Chronic exposure</i><br>OR (95% CI)       |                                |                      |                      |                      |                                 |
| 1 <sup>st</sup> trimester                    | 1.13 (0.98, 1.31)              | 0.91 (0.82, 1.01)    | 0.68 (0.34, 1.36)    | 0.90 (0.85, 0.96)    | 0.22                            |
| 2 <sup>nd</sup> trimester                    | 0.87 (0.79, 0.95)              | 0.99 (0.93, 1.06)    | 1.23 (0.93, 1.63)    | 0.93 (0.82, 1.04)    | 0.30                            |
| 3 <sup>rd</sup> trimester                    | 0.96 (0.83, 1.11)              | 0.92 (0.85, 0.99)    | 1.02 (0.96, 1.08)    | 0.99 (0.92, 1.07)    | 0.06                            |
| Whole pregnancy                              | 0.86 (0.69, 1.06)              | 0.87 (0.75, 1.02)    | 1.38 (0.85, 2.24)    | 0.87 (0.74, 1.01)    | 0.74                            |
| <i>Acute exposure</i><br>HR (95% CI)         |                                |                      |                      |                      |                                 |
| Last 4 weeks of pregnancy                    | 0.80 (0.61, 1.02)              | 1.07 (0.97, 1.17)    | 0.98 (0.87, 1.10)    | 0.89 (0.83, 1.02)    | 0.75                            |
| Same day of delivery                         | 0.99 (0.96, 1.02)              | 0.99 (0.97, 1.01)    | 0.99 (0.97, 1.01)    | 0.99 (0.97, 1.01)    | 0.92                            |
| <b>Term birth weight</b><br>$\beta$ (95% CI) |                                |                      |                      |                      |                                 |
| 1 <sup>st</sup> trimester                    | -4.24 (-13.53, 5.06)           | -0.27 (-8.20, 7.66)  | -2.08 (-13.79, 9.63) | -1.22 (-10.17, 7.74) | 0.49                            |
| 2 <sup>nd</sup> trimester                    | -4.48 (-13.83, 4.88)           | -2.75 (-5.07, 10.56) | -5.46 (-16.19, 5.26) | 1.75 (-6.38, 9.90)   | 0.53                            |
| 3 <sup>rd</sup> trimester                    | -5.98 (-15.18, 3.22)           | 12.70 (5.21, 20.18)  | 17.89 (6.89, 28.88)  | 0.01 (-7.74, 7.75)   | 0.18                            |
| Whole pregnancy                              | -7.38 (-19.19, 7.43)           | 12.21 (0.06, 24.36)  | 15.54 (-2.07, 33.15) | 0.07 (-12.01, 12.16) | 0.35                            |

Estimates of association are for IQR increases in exposure to PM<sub>2.5</sub> (2.6  $\mu\text{g}/\text{m}^3$ ). Models represent pooled city-specific estimates derived using two-stage random effects meta-analysis and logistic regression (term low birth

weight and ORs for preterm birth in association with chronic exposures), Cox proportional hazard models (HRs for preterm birth in association with IQR increases in exposure to PM<sub>2.5</sub> (7.1 µg/m<sup>3</sup>) during the last 4 weeks of pregnancy or on the day of delivery), or linear regression (term birth weight). Models were adjusted for maternal age at delivery, marital status, maternal cigarette smoking during pregnancy, infant sex, parity, previous caesarean section delivery, maternal comorbidities (i.e. asthma, hypertension, type I and II diabetes mellitus, preeclampsia and gestational diabetes), year of birth, month of birth, census dissemination area median family income, census dissemination area proportion of population who are visible minority and census dissemination area proportion of the adult female population aged 25-64 years old who completed postsecondary education; gestational age was also included in term low birth weight and term birth weight models; mean temperature and mean relative humidity were also included in preterm birth acute exposure models. Random-effects multivariate meta-regression models were used to test potential effect modification by between-city differences in OP<sup>AA</sup>. The outcome variables in the meta-regression models in this study were the pooled estimates and the explanatory variable (i.e. potential effect modifier) was the categorical variable of OP<sup>AA</sup> at the city level. Effect modification was considered statistically significant if the effect modifier's p-value was less than 0.05.

Abbreviations: OR: Odds ratio; HR: Hazard ratio; β: beta coefficient; OP<sup>AA</sup>: ascorbate-related oxidative potential

**Table S8.** Second-stage random-effects meta-analysis and meta-regression models: multivariate Wald test on significance of each oxidative potential meta-predictor in explaining variation in overall associations, Cochran Q test for heterogeneity,  $I^2$  statistics for residual heterogeneity.

| Birth outcome and exposure   | Test for effect modification by regional oxidative potential (p value) | Q test (p value) | $I^2$ |
|------------------------------|------------------------------------------------------------------------|------------------|-------|
| <b>Term low birth weight</b> |                                                                        |                  |       |
| 1 <sup>st</sup> trimester    |                                                                        |                  |       |
| Base                         |                                                                        | 0.485            | 1.0%  |
| OP <sup>GSH</sup>            | 0.021                                                                  | 0.721            | 1.0%  |
| OP <sup>AA</sup>             | 0.146                                                                  | 0.535            | 1.0%  |
| 2 <sup>nd</sup> trimester    |                                                                        |                  |       |
| Base                         |                                                                        | 0.847            | 1.0%  |
| OP <sup>GSH</sup>            | 0.487                                                                  | 0.832            | 1.0%  |
| OP <sup>AA</sup>             | 0.755                                                                  | 0.817            | 1.0%  |
| 3 <sup>rd</sup> trimester    |                                                                        |                  |       |
| Base                         |                                                                        | 0.510            | 1.0%  |
| OP <sup>GSH</sup>            | 0.287                                                                  | 0.517            | 1.0%  |
| OP <sup>AA</sup>             | 0.399                                                                  | 0.496            | 1.0%  |
| Whole pregnancy              |                                                                        |                  |       |
| Base                         |                                                                        | 0.187            | 18.2% |
| OP <sup>GSH</sup>            | 0.002                                                                  | 0.549            | 1.0%  |
| OP <sup>AA</sup>             | 0.344                                                                  | 0.180            | 18.9% |
| <b>Term birth weight</b>     |                                                                        |                  |       |
| 1 <sup>st</sup> trimester    |                                                                        |                  |       |
| Base                         |                                                                        | 0.999            | 1.0%  |
| OP <sup>GSH</sup>            | 0.55                                                                   | 0.999            | 1.0%  |
| OP <sup>AA</sup>             | 0.42                                                                   | 0.999            | 1.0%  |
| 2 <sup>nd</sup> trimester    |                                                                        |                  |       |
| Base                         |                                                                        |                  |       |
| OP <sup>GSH</sup>            | 0.82                                                                   | 0.453            | 1.0%  |
| OP <sup>AA</sup>             | 0.56                                                                   | 0.468            | 1.0%  |
| 3 <sup>rd</sup> trimester    |                                                                        |                  |       |
| Base                         |                                                                        | 0.083            | 27.3% |
| OP <sup>GSH</sup>            | 0.19                                                                   | 0.100            | 25.8% |
| OP <sup>AA</sup>             | 0.30                                                                   | 0.078            | 28.4% |
| Whole pregnancy              |                                                                        |                  |       |
| Base                         |                                                                        | 0.832            | 1.0%  |
| OP <sup>GSH</sup>            | 0.31                                                                   | 0.839            | 1.0%  |
| OP <sup>AA</sup>             | 0.30                                                                   | 0.840            | 1.0%  |
| <b>Preterm birth</b>         |                                                                        |                  |       |
| 1 <sup>st</sup> trimester    |                                                                        |                  |       |
| Base                         |                                                                        | < 0.001          | 82.1% |
| OP <sup>GSH</sup>            | 0.861                                                                  | < 0.001          | 82.4% |
| OP <sup>AA</sup>             | 0.386                                                                  | < 0.001          | 82.3% |
| 2 <sup>nd</sup> trimester    |                                                                        |                  |       |
| Base                         |                                                                        | < 0.001          | 74.8% |
| OP <sup>GSH</sup>            | 0.632                                                                  | < 0.001          | 75.6% |

|                           |       |         |       |
|---------------------------|-------|---------|-------|
| OP <sup>AA</sup>          | 0.503 | < 0.001 | 75.6% |
| 3 <sup>rd</sup> trimester |       |         |       |
| Base                      |       | 0.002   | 47.0% |
| OP <sup>GSH</sup>         | 0.483 | 0.002   | 48.5% |
| OP <sup>AA</sup>          | 0.238 | 0.003   | 46.5% |
| Whole pregnancy           |       |         |       |
| Base                      |       | < 0.001 | 65.3% |
| OP <sup>GSH</sup>         | 0.436 | < 0.001 | 66.0% |
| OP <sup>AA</sup>          | 0.956 | < 0.001 | 66.3% |
| Last 4 weeks of pregnancy |       |         |       |
| Base                      |       | 0.488   | 1.0%  |
| OP <sup>GSH</sup>         | 0.711 | 0.651   | 1.0%  |
| OP <sup>AA</sup>          | 0.882 | 0.541   | 1.0%  |
| Same day of delivery      |       |         |       |
| Base                      |       | 0.523   | 1.0%  |
| OP <sup>GSH</sup>         | 0.041 | 0.830   | 1.0%  |
| OP <sup>AA</sup>          | 0.901 | 0.783   | 1.0%  |

For each outcome and exposure period, three meta-regression models are being presented: base model with no predictors (i.e. only including pooled ORs), model with meta-predictor OP<sup>GSH</sup> and model with meta-predictor OP<sup>AA</sup>. Random-effects multivariate meta-regression models were used to test potential effect modification by between-city differences in OP<sup>GSH</sup> and OP<sup>AA</sup>. The outcome variables in the meta-regression models in this study were the pooled estimates and the explanatory variable (i.e. potential effect modifier) was the continuous variable of OP<sup>GSH</sup> or OP<sup>AA</sup> at the city level. Effect modification was considered statistically significant if the effect modifier's p-value was less than 0.05.

Abbreviations: OP<sup>GSH</sup>: glutathione-related oxidative potential; OP<sup>AA</sup>: ascorbate-related oxidative potential

**Table S9.** Associations between exposure to PM<sub>2.5</sub> and PM<sub>2.5</sub> oxidative burden over different periods of exposure during pregnancy and birth outcomes in Ontario, Canada (2006 – 2012).

| Model                                    | PM <sub>2.5</sub>   | PM <sub>2.5</sub> *OP <sup>GSH</sup> | PM <sub>2.5</sub> *OP <sup>AA</sup> |
|------------------------------------------|---------------------|--------------------------------------|-------------------------------------|
| <b>Term low birth weight OR (95% CI)</b> |                     |                                      |                                     |
| 1 <sup>st</sup> trimester                | 1.08 (1.01, 1.15)   | 1.31 (1.07, 1.61)                    | 1.12 (0.95, 1.32)                   |
| 2 <sup>nd</sup> trimester                | 0.96 (0.92, 1.02)   | 0.94 (0.80, 1.10)                    | 0.92 (0.82, 1.04)                   |
| 3 <sup>rd</sup> trimester                | 0.95 (0.90, 1.00)   | 0.92 (0.79, 1.07)                    | 0.89 (0.79, 1.00)                   |
| Whole pregnancy                          | 0.96 (0.86, 1.07)   | 1.15 (0.84, 1.56)                    | 0.90 (0.73, 1.11)                   |
| <b>Term birth weight β (95% CI)</b>      |                     |                                      |                                     |
| 1 <sup>st</sup> trimester                | -0.91 (-5.64, 3.83) | -3.74 (-15.24, 7.76)                 | -0.74 (-9.11, 7.63)                 |
| 2 <sup>nd</sup> trimester                | 0.88 (-3.68, 5.45)  | -2.41 (-13.77, 8.96)                 | 3.26 (-4.71, 11.23)                 |
| 3 <sup>rd</sup> trimester                | 6.60 (-2.22, 12.98) | 6.69 (-4.26, 17.63)                  | 10.62 (2.89, 18.35)                 |
| Whole pregnancy                          | 5.49 (-1.46, 12.33) | 1.50 (-12.98, 15.98)                 | 9.19 (-1.94, 20.32)                 |

Estimates of association are for IQR increases in exposure to PM<sub>2.5</sub> (2.6 µg/m<sup>3</sup>), PM<sub>2.5</sub>\*OP<sup>GSH</sup> (1.16% depletion/m<sup>3</sup>), or PM<sub>2.5</sub>\*OP<sup>AA</sup> (1.42% depletion/m<sup>3</sup>). Models represent pooled city-specific estimates derived using two-stage random effects meta-analysis and logistic regression (term low birth weight and ORs for preterm birth in association with chronic exposures) or linear regression (term birth weight). Models were adjusted for maternal age at delivery, marital status, maternal cigarette smoking during pregnancy, infant sex, parity, previous caesarean section delivery, maternal comorbidities (i.e. asthma, hypertension, type I and II diabetes mellitus, preeclampsia and gestational diabetes), gestational age, year of birth, month of birth, census dissemination area median family income, census dissemination area proportion of population who are visible minority and census dissemination area proportion of the adult female population aged 25-64 years old who completed postsecondary education, mean temperature and mean relative humidity.

Abbreviations: OR: Odds ratio; β: beta coefficient; PM<sub>2.5</sub>\*OP<sup>GSH</sup>: glutathione-related oxidative burden; PM<sub>2.5</sub>\*OP<sup>AA</sup>: ascorbate-related oxidative burden.

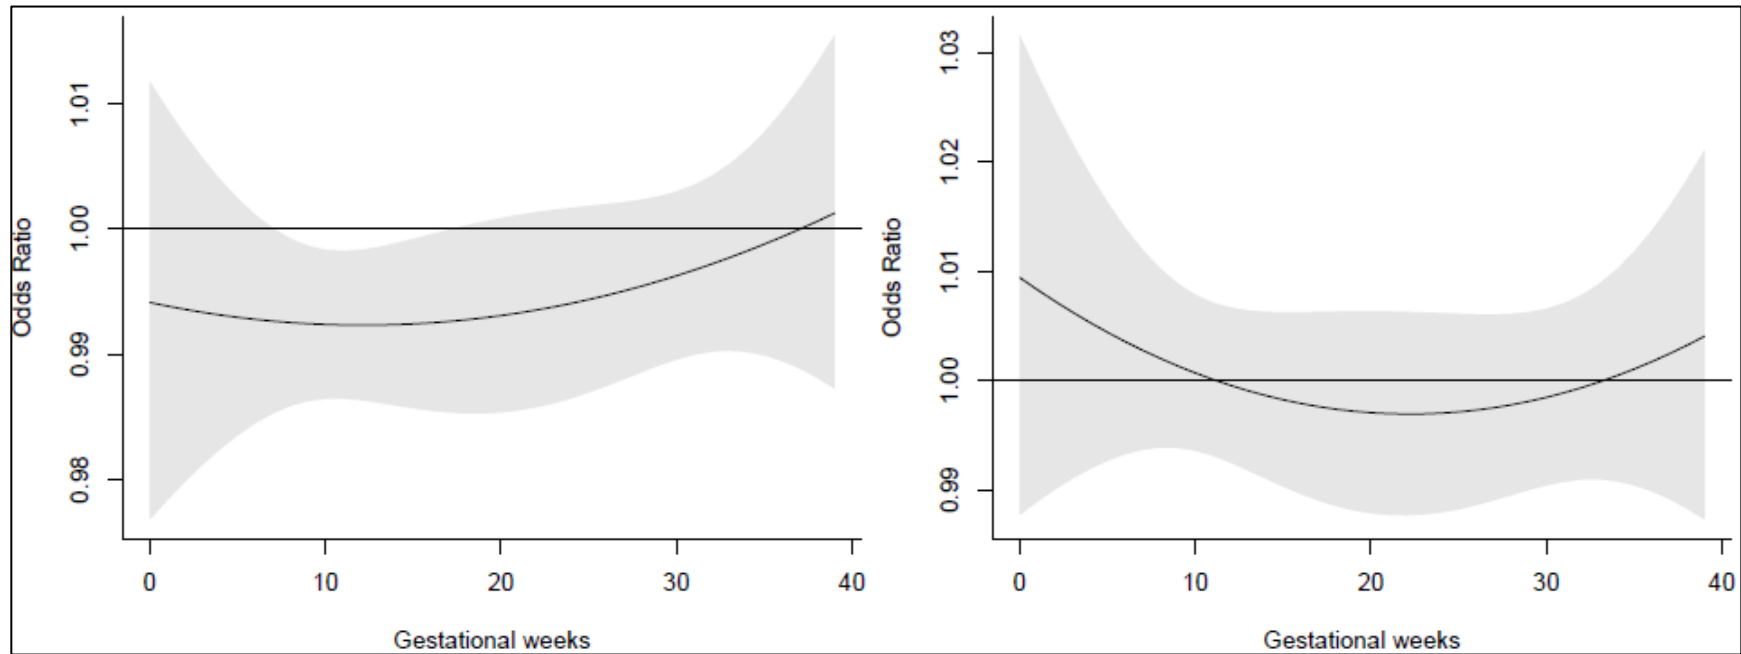

**Figure S1.** Associations between weekly  $PM_{2.5}$  levels over gestation and term low birth weight, stratified according to below 25th percentile of  $OP^{GSH}$  (left) and above the 75th percentile of  $OP^{GSH}$  (right) in Ontario, Canada (2006 – 2012). Solid lines reflect point estimates and gray areas reflect 95% confidence intervals.

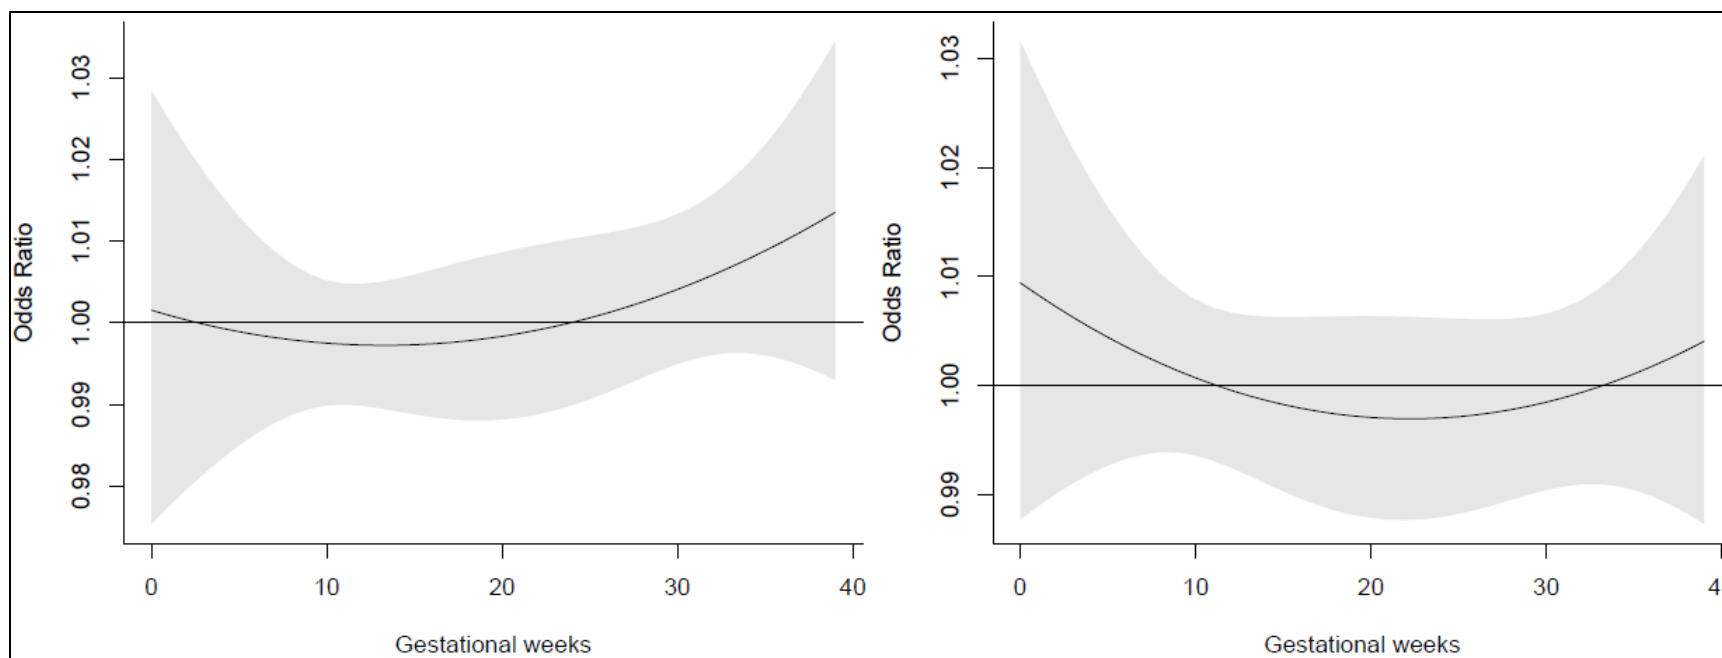

**Figure S2.** Associations between weekly PM<sub>2.5</sub> levels over gestation and term low birth weight, stratified according to below 25th percentile of OP<sup>AA</sup> (left) and above the 75th percentile of OP<sup>AA</sup> (right) in Ontario, Canada (2006 – 2012). Solid lines reflect point estimates and gray areas reflect 95% confidence intervals.

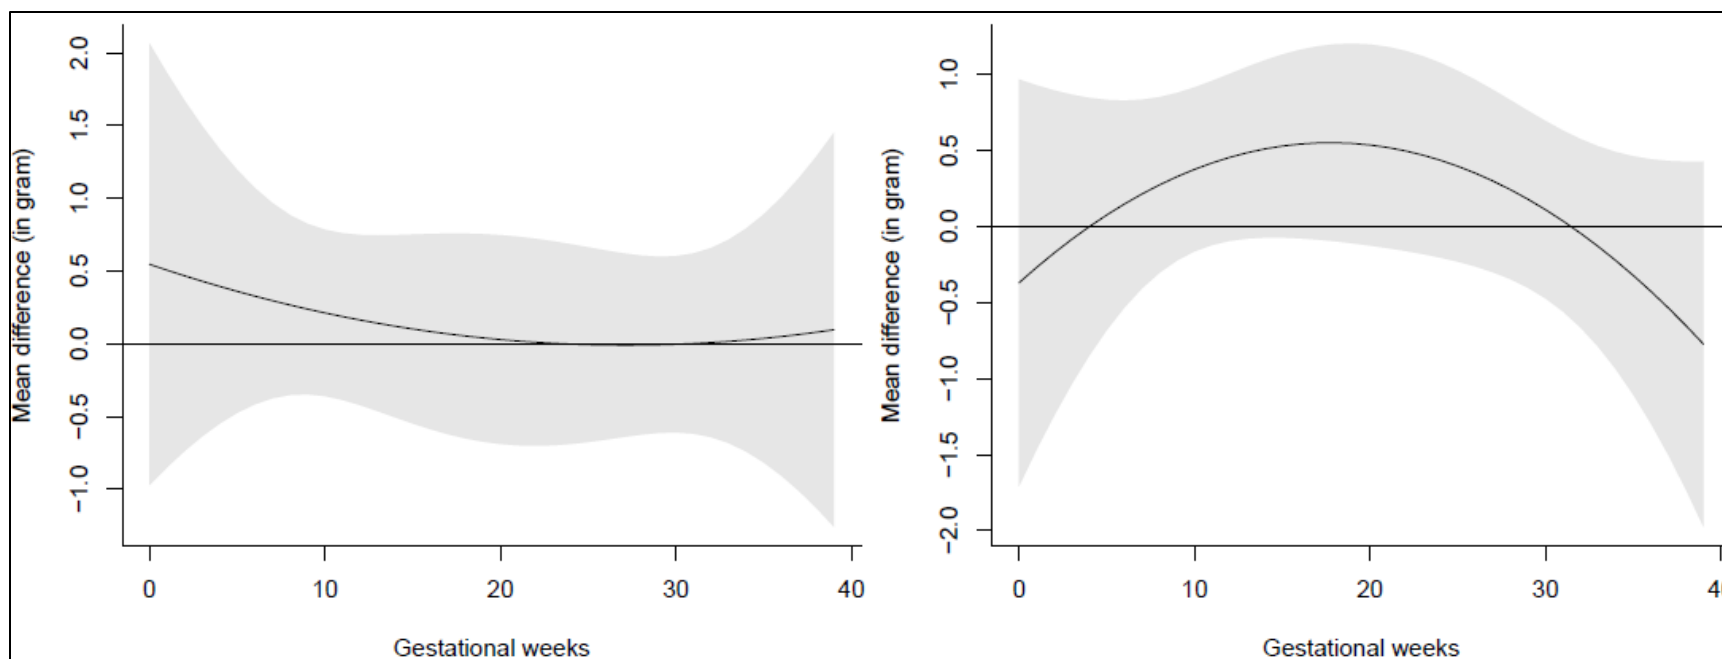

**Figure S3.** Associations between weekly  $PM_{2.5}$  levels over gestation and term birth weight, stratified according to below 25th percentile of  $OP^{GSH}$  (left) and above the 75th percentile of  $OP^{GSH}$  (right) in Ontario, Canada (2006 – 2012). Solid lines reflect point estimates and gray areas reflect 95% confidence intervals.



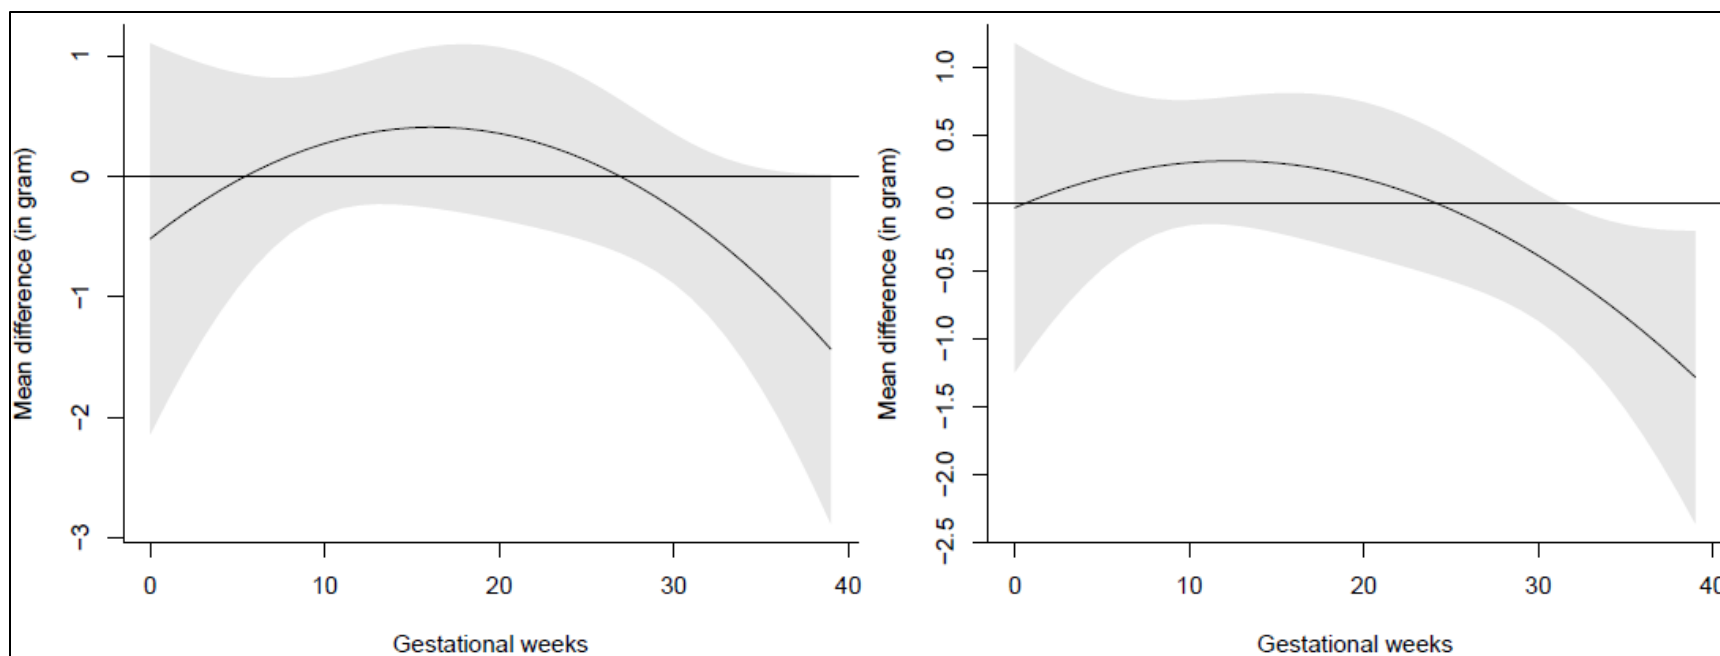

**Figure S4.** Associations between weekly  $PM_{2.5}$  levels over gestation and term birth weight, stratified according to below 25th percentile of  $OP^{AA}$  (left) and above the 75th percentile of  $OP^{AA}$  (right) in Ontario, Canada (2006 – 2012). Solid lines reflect point estimates and gray areas reflect 95% confidence intervals.

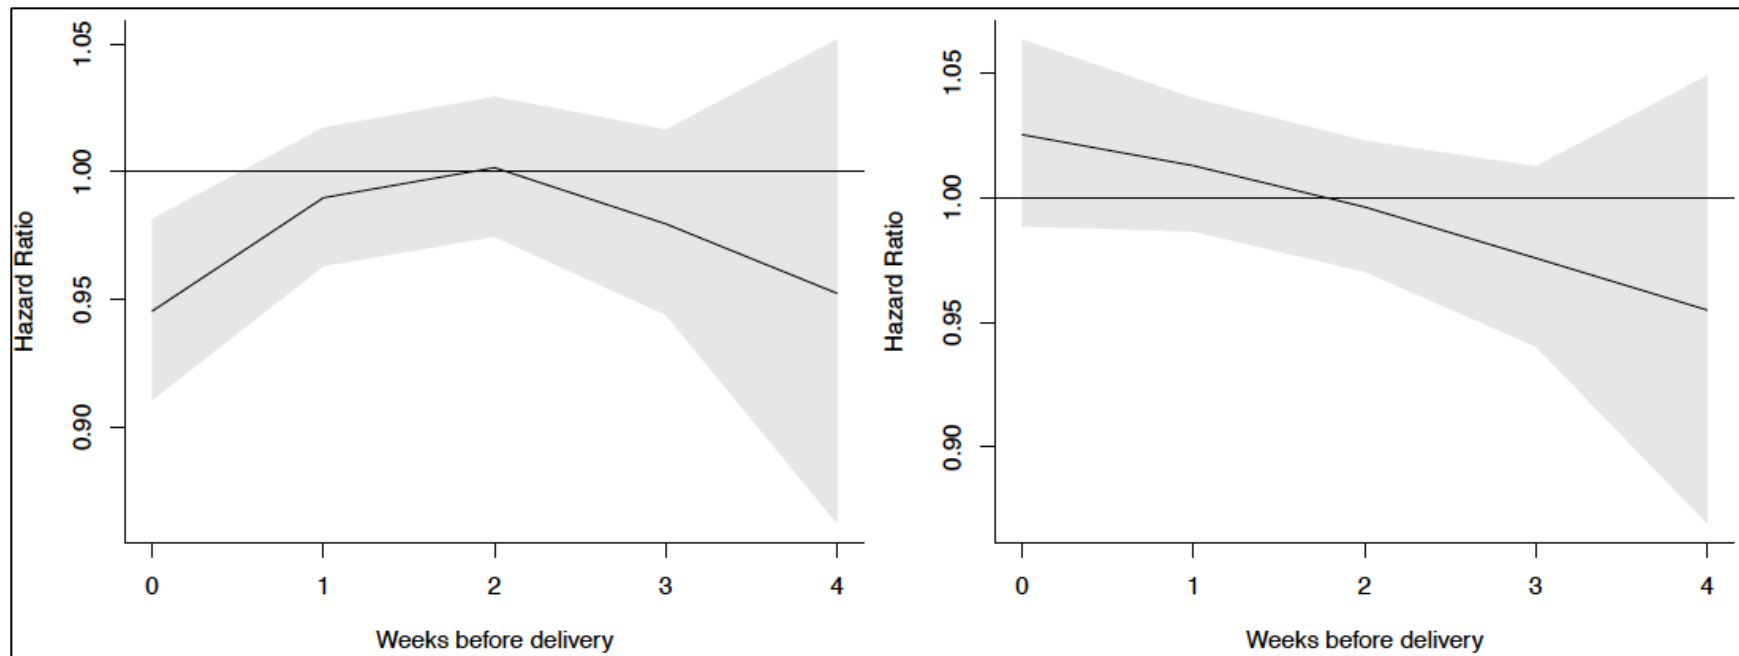

**Figure S5.** Associations between weekly PM<sub>2.5</sub> levels over the last 4 weeks of pregnancy and preterm birth, stratified according to below 25th percentile of OP<sup>GSH</sup> (left) and above the 75th percentile of OP<sup>GSH</sup> (right) in Ontario, Canada (2006 – 2012). Solid lines reflect point estimates and gray areas reflect 95% confidence intervals.

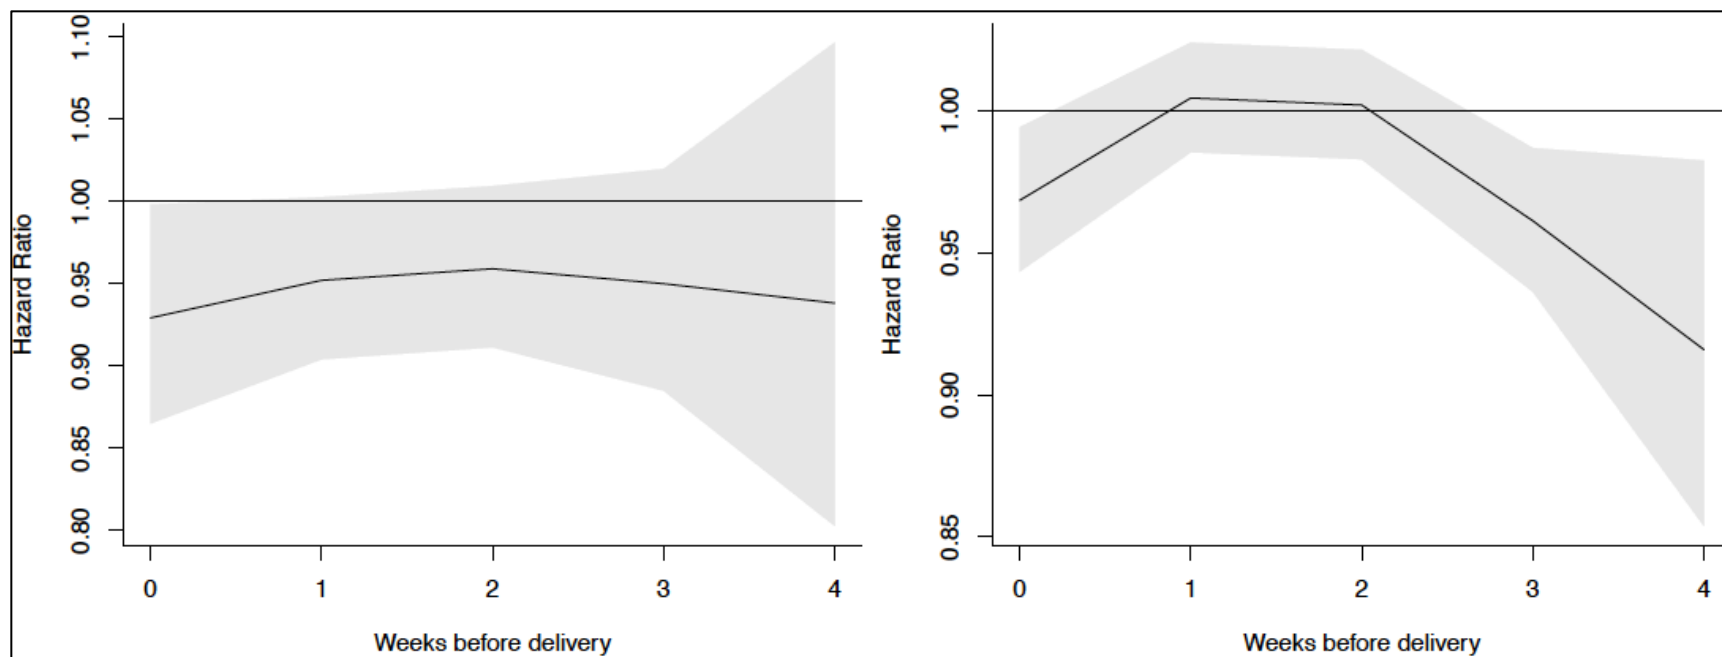

**Figure S6.** Associations between weekly  $PM_{2.5}$  levels over the last 4 weeks of pregnancy and preterm birth, stratified according to below 25th percentile of  $OP^{AA}$  (left) and above the 75th percentile of  $OP^{AA}$  (right) in Ontario, Canada (2006 – 2012). Solid lines reflect point estimates and gray areas reflect 95% confidence intervals.

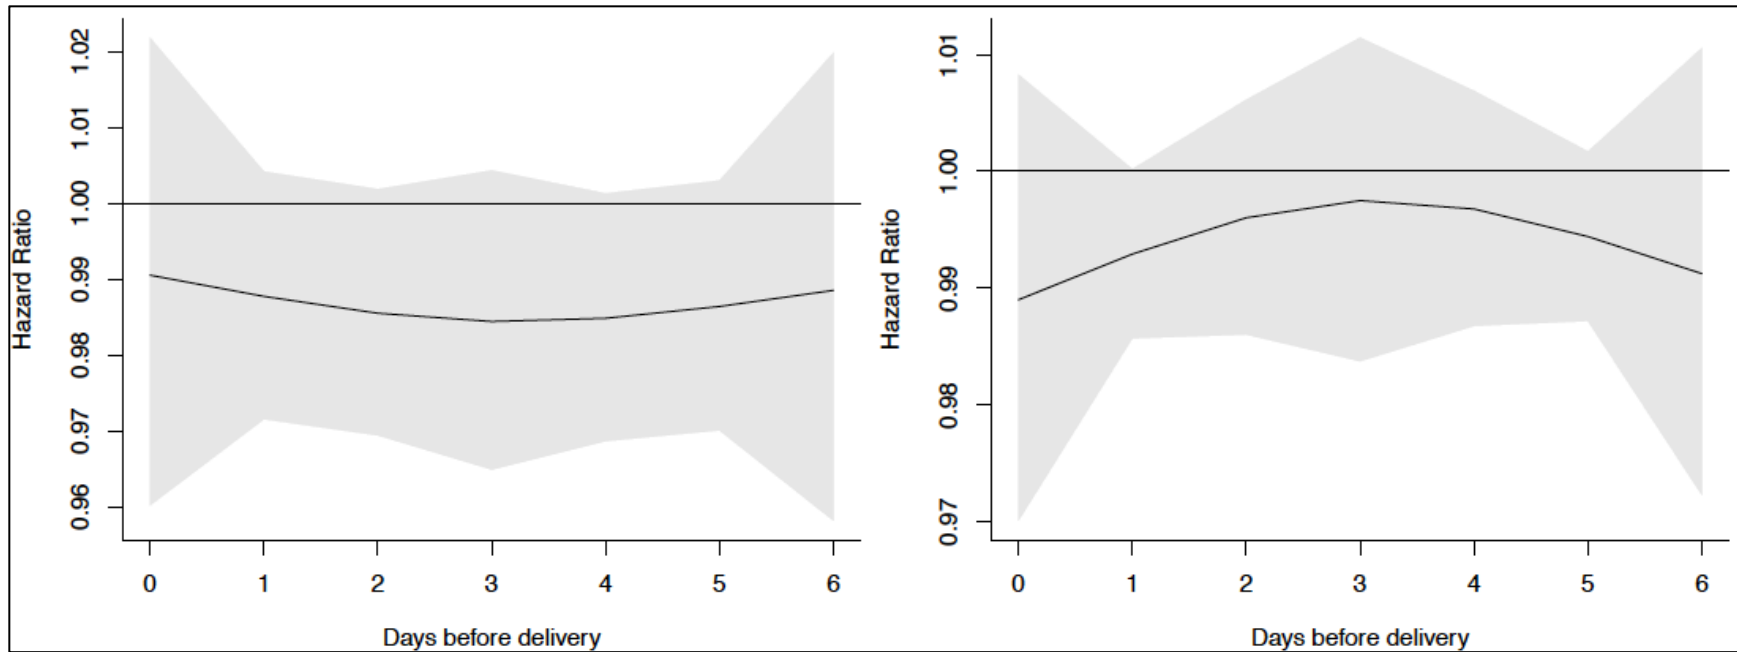

**Figure S7.** Associations between daily  $PM_{2.5}$  levels over the last week of pregnancy and preterm birth, stratified according to below 25th percentile of  $OP^{AA}$  (left) and above the 75th percentile of  $OP^{AA}$  (right) in Ontario, Canada (2006 – 2012). Solid lines reflect point estimates and gray areas reflect 95% confidence intervals.
